# Supplementary material for: OCT1 is a determinant of synbindin-related ERK signalling with independent prognostic significance in gastric cancer
Source: HighWire-hosted journal article supplement (doi:10.1136/gutjnl-2013-306584), 2014-04-09
Supplement: gutjnl-2013-306584supp_table1.pdf [file gutjnl-2013-306584supp_table1.pdf]

**Supplementary Table 1.** OCT1 expression levels and clinical features of gastric cancer cases.

| Survival (months) | time | Survival status | Tumor (cm3) | size | Sex    | Age (years) | AJCC stages | OCT1 level |
|-------------------|------|-----------------|-------------|------|--------|-------------|-------------|------------|
| 59                |      | Alive           | 3.15        |      | Male   | 72          | II          | 11.213     |
| 59                |      | Alive           | 8.75        |      | Male   | 49          | I           | 15.429     |
| 55                |      | Alive           | 60          |      | Male   | 52          | III         | 16.379     |
| 27                |      | Dead            | 33          |      | Male   | 79          | III         | 18.1       |
| 61                |      | Alive           | 11.25       |      | Male   | 71          | II          | 18.629     |
| 59                |      | Alive           | 2.1         |      | Male   | 80          | I           | 18.801     |
| 39                |      | Dead            | 21          |      | Male   | 74          | III         | 20.437     |
| 9                 |      | Dead            | 12          |      | Male   | 58          | III         | 20.508     |
| 63                |      | Alive           | 5.28        |      | Female | 75          | I           | 20.875     |
| 46                |      | Dead            | 17.5        |      | Male   | 59          | II          | 21.06      |
| 43                |      | Dead            | N/A         |      | Female | 59          | I           | 21.249     |
| 19                |      | Dead            | 6           |      | Male   | 59          | III         | 21.357     |
| 59                |      | Alive           | 5           |      | Male   | 73          | II          | 21.523     |
| 60                |      | Alive           | 6           |      | Female | 72          | III         | 22.177     |
| 60                |      | Alive           | 50          |      | Male   | 73          | II          | 22.685     |
| 26                |      | Dead            | 3.6         |      | Male   | 61          | III         | 22.847     |
| 61                |      | Alive           | 32          |      | Male   | 58          | III         | 23.421     |
| 24                |      | Dead            | 33.75       |      | Female | 53          | III         | 23.648     |
| 61                |      | Alive           | 6           |      | Female | 73          | II          | 24         |
| N/A               |      | Alive           | 17.5        |      | Male   | 61          | III         | 24.097     |
| 22                |      | Dead            | 7           |      | Male   | 76          | III         | 24.263     |
| 42                |      | Dead            | 54          |      | Male   | 59          | III         | 24.653     |
| 59                |      | Alive           | 20          |      | Female | 65          | III         | 24.859     |
| 60                |      | Alive           | 390         |      | Male   | 63          | III         | 25.729     |
| 2                 |      | Dead            | 6           |      | Male   | 83          | II          | 26.729     |
| 59                |      | Alive           | 45          |      | Male   | 54          | II          | 26.733     |
| 21                |      | Dead            | 7.2         |      | Male   | 63          | II          | 26.786     |
| 31                |      | Dead            | 45          |      | Male   | 53          | III         | 26.825     |
| 61                |      | Alive           | 11.2        |      | Male   | 63          | II          | 27.257     |
| 35                |      | Dead            | 121.5       |      | Male   | 58          | III         | 27.288     |
| 55                |      | Alive           | 30          |      | Male   | 62          | III         | 27.666     |
| 62                |      | Alive           | 9           |      | Male   | 75          | II          | 28.092     |
| 44                |      | Dead            | 20          |      | Male   | 65          | III         | 28.511     |
| 62                |      | Alive           | 16          |      | Female | 53          | II          | 28.667     |
| 62                |      | Alive           | 24          |      | Male   | 82          | III         | 29.065     |
| 42                |      | Dead            | 9.45        |      | Male   | 71          | III         | 29.531     |
| 17                |      | Dead            | 180         |      | Male   | 65          | IV          | 29.806     |
| 61                |      | Alive           | 20          |      | Male   | 57          | III         | 29.81      |
| 61                |      | Alive           | 32          |      | Male   | 79          | III         | 30.207     |
| 32                |      | Dead            | 37.125      |      | Male   | 59          | III         | 30.217     |
| 61                |      | Alive           | 25          |      | Male   | 67          | II          | 30.678     |
| 10                |      | Dead            | 40.5        |      | Male   | 73          | III         | 30.936     |
| 60                |      | Alive           | 5.4         |      | Male   | 67          | II          | 31.002     |
| 63                |      | Alive           | 27          |      | Female | 69          | III         | 32.417     |
| 60                |      | Alive           | 2           |      | Male   | 45          | I           | 32.589     |
| 39                |      | Dead            | N/A         |      | Male   | 69          | II          | 32.65      |
| 26                |      | Dead            | 30          |      | Male   | 58          | III         | 32.992     |
| 59                |      | Alive           | N/A         |      | Male   | 57          | II          | 33.062     |
| 28                |      | Dead            | 8           |      | Female | 62          | II          | 33.073     |
| 61                |      | Alive           | 190         |      | Male   | 55          | III         | 33.177     |

|    |       |        |        |    |     |        |
|----|-------|--------|--------|----|-----|--------|
| 5  | Dead  | 30     | Female | 66 | III | 33.4   |
| 11 | Dead  | 16.8   | Female | 79 | III | 33.462 |
| 35 | Dead  | 3.25   | Male   | 49 | III | 34.141 |
| 60 | Alive | 40.5   | Female | 41 | II  | 34.186 |
| 5  | Dead  | 35.75  | Male   | 55 | III | 34.607 |
| 15 | Dead  | 37.5   | Female | 77 | II  | 34.831 |
| 6  | Dead  | 49.5   | Female | 72 | III | 35.139 |
| 37 | Dead  | 66     | Male   | 45 | II  | 35.314 |
| 27 | Dead  | 220    | Male   | 59 | II  | 35.502 |
| 43 | Dead  | 26     | Male   | 73 | II  | 35.512 |
| 1  | Dead  | 42     | Female | 72 | III | 36.29  |
| 36 | Dead  | 3.75   | Male   | 80 | II  | 36.862 |
| 9  | Dead  | 42     | Female | 68 | II  | 36.901 |
| 63 | Alive | 144    | Male   | 63 | II  | 37.25  |
| 11 | Dead  | 117    | Male   | 50 | III | 37.48  |
| 14 | Dead  | 22.5   | Male   | 72 | II  | 37.667 |
| 15 | Dead  | 12     | Male   | 78 | II  | 37.838 |
| 43 | Dead  | 30     | Female | 83 | III | 37.916 |
| 58 | Dead  | 91     | Male   | 68 | III | 38.174 |
| 27 | Dead  | 117    | Male   | 80 | III | 38.288 |
| 0  | Dead  | 48     | Male   | 81 | III | 38.652 |
| 2  | Dead  | 63     | Male   | 78 | I   | 38.93  |
| 13 | Dead  | 84     | Male   | 62 | III | 39.875 |
| 9  | Dead  | 21     | Male   | 68 | III | 40.56  |
| 11 | Dead  | 32     | Male   | 81 | III | 40.771 |
| 23 | Dead  | 42.25  | Male   | 50 | III | 42.65  |
| 25 | Dead  | 48.75  | Female | 75 | III | 42.999 |
| 39 | Dead  | 19.25  | Male   | 69 | II  | 44.631 |
| 35 | Dead  | 30.375 | Male   | 71 | III | 46.262 |
| 2  | Dead  | 105    | Male   | 63 | III | 47.239 |
| 10 | Dead  | 54.6   | Female | 65 | III | 47.838 |
| 15 | Dead  | 108    | Male   | 75 | IV  | 49.477 |
| 16 | Dead  | 112.5  | Male   | 79 | III | 51.465 |
| 62 | Alive | 160    | Male   | 47 | II  | 51.675 |
| 24 | Dead  | 105    | Female | 65 | III | 52.877 |
| 34 | Dead  | 180    | Female | 62 | II  | 53.167 |
| 5  | Dead  | 136.5  | Male   | 63 | III | 54.223 |
| 29 | Dead  | 71.5   | Male   | 57 | III | 57.265 |
| 24 | Dead  | 520    | Female | 34 | IV  | 74.838 |
| 28 | Dead  | 250    | Female | 79 | III | 81.521 |

---
